# Supplementary material
Source: PubMed Central journal article supplement (PMC156367)
Supplement: plntcell_15_6_1296__1.pdf [file plntcell_15_6_1296__1.pdf]

## SUPPLEMENTARY MATERIAL

Supplementary Table 1: Accessions and sequences

| Species                                                  | Family                     | GenBank Accession No. ( <i>AGAMOUS</i> intron/ <i>coding</i> ) | GenBank Accession No. ( <i>ITS</i> ) | Provenance                                    | Botanical Catalog (Year) |
|----------------------------------------------------------|----------------------------|----------------------------------------------------------------|--------------------------------------|-----------------------------------------------|--------------------------|
| <i>Aethionema arabicum</i> (L.) Andr. ex Schultz         | Brassicaceae               | Not sequenced                                                  | AY254539                             | Conservatoire et Jardins Botaniques de Nancy  | 267                      |
| <i>Alyssum saxatile</i> L.                               | Brassicaceae               | AY253249                                                       | AF401115                             | NK Lawn & Garden Co                           |                          |
| <i>Antirrhinum majus</i> L.                              | Veronicaceae               | AJ239057 ( <i>FAR</i> )                                        | NA                                   | NA                                            |                          |
| <i>Antirrhinum majus</i> L.                              | Veronicaceae               | Des Bradley, pers. comm. ( <i>PLE</i> )/ S53900                | NA                                   | NA                                            |                          |
| <i>Arabidopsis (Cardaminopsis) arenosa</i> (L.) Hayek    | Brassicaceae               | AY253237                                                       | U52188                               | Univ. Kiel Botanical Garden                   | 317                      |
| <i>Arabidopsis lyrata</i> (L.) O'Kane et Al-Shehbaz      | Brassicaceae               | AY253251                                                       | AJ232889                             | NA                                            |                          |
| <i>Arabidopsis thaliana</i> (L.) Heynh. cv. Columbia     | Brassicaceae               | AL161549/ X53519                                               | AJ232900                             | NA                                            |                          |
| <i>Arabis gunnisoniana</i> Rollins                       | Brassicaceae               | AY253244                                                       | AY254540                             | Tom Mitchell-Olds, Jena, Germany              |                          |
| <i>Arabis pumila</i> Jacq.                               | Brassicaceae               | AY253243                                                       | AY254546                             | ABRC, Ohio                                    | CS3701                   |
| <i>Barbarea vulgaris</i> R. Br.                          | Brassicaceae               | Not sequenced                                                  | AJ232915                             | NA                                            |                          |
| <i>Barbarea vulgaris</i> R. Br.                          | Brassicaceae               | AY253235                                                       | Not sequenced                        | Univ. Kiel Botanical Garden                   | 311                      |
| <i>Berteroa incana</i> (L.) DC.                          | Brassicaceae               | AY253236                                                       | AY254544                             | Univ. Kiel Botanical Garden                   | 312                      |
| <i>Brassica oleracea</i> L. var. <i>botrytis</i>         | Brassicaceae               | Not sequenced                                                  | AF128099                             | NA                                            |                          |
| <i>Brassica oleracea</i> L. var. <i>oleracea</i> cv. A12 | Brassicaceae               | AY253241/ M99415                                               | Not sequenced                        | Graham King, Horticultural Research Int'l, UK |                          |
| <i>Cakile maritima</i> Scop.                             | Brassicaceae               | AY253256                                                       | AY254541                             | Jardin Botanique de Bordeaux                  | 204                      |
| <i>Camelina microcarpa</i> Andr. ex DC.                  | Brassicaceae               | Not sequenced                                                  | AF137574                             | NA                                            |                          |
| <i>Camelina sativa</i> (L.) Crantz                       | Brassicaceae               | AY253253/ AY277683                                             | Not sequenced                        | Univ. Kiel Botanical Garden                   | 316                      |
| <i>Capsella bursa-pastoris</i> (L.) Medikus              | Brassicaceae               | AY253262/ AY277680, AY277681, AY277682                         | Not sequenced                        | SASSC, Sendai, Japan                          | J025                     |
| <i>Capsella bursa-pastoris</i> (L.) Medikus              | Brassicaceae               | Not sequenced                                                  | AF055196                             | NA                                            |                          |
| <i>Capsella rubella</i> Reut.                            | Brassicaceae               | AY253263/ AY277679                                             | AY254537                             | Marcus Koch, Vienna, Austria                  |                          |
| <i>Cardamine corymbosa</i> F.                            | Brassicaceae               | Not sequenced                                                  | AF100678                             | NA                                            |                          |
| <i>Caulanthus inflatus</i> S. Wats.                      | Brassicaceae               | Not sequenced                                                  | AF346653                             | NA                                            |                          |
| <i>Cheiranthus cheiri</i> L.                             | Brassicaceae               | AY253258                                                       | AY254538                             | Botanical Interests Inc.*                     |                          |
| <i>Cleome spinosa</i> Jacq.                              | Brassicaceae (Capparaceae) | Not sequenced                                                  | AY254535                             | Madison WI, near Student Union                |                          |
| <i>Conringia orientalis</i> (L.) Dumort                  | Brassicaceae               | AY253252                                                       | AY254545                             | Univ. Kiel Botanical Garden                   | 319                      |

|                                                                                    |               |                                        |               |                                              |              |
|------------------------------------------------------------------------------------|---------------|----------------------------------------|---------------|----------------------------------------------|--------------|
| <i>Coronopus squamatus</i> (Forsk.) Ashers.                                        | Brassicaceae  | AY253246/ AY277684, AY277685           | AY254533      | Univ. Kiel Botanical Garden                  | 320          |
| <i>Cucumis sativus</i> L.                                                          | Cucurbitaceae | AY254704 ( <i>CUM1</i> )/ AF035438     | NA            | Botanical Interests Inc.*                    |              |
| <i>Cucumis sativus</i> L.                                                          | Cucurbitaceae | AY254702 ( <i>CAG1</i> )               | NA            | Botanical Interests Inc.*                    |              |
| <i>Cucumis sativus</i> L.                                                          | Cucurbitaceae | AY254703 ( <i>CAG2</i> )               | NA            | Botanical Interests Inc.*                    |              |
| <i>Cusickiella douglasii</i> (A. Gray) Rollins                                     | Brassicaceae  | Not sequenced                          | AF146515      | NA                                           |              |
| <i>Diplotaxis catholica</i> (L.) DC.                                               | Brassicaceae  | AY253257                               | Not sequenced | Jardin Botanique de Bordeaux                 | 210          |
| <i>Diplotaxis erucoides</i> (L.) DC.                                               | Brassicaceae  | Not sequenced                          | AF263401      | NA                                           |              |
| <i>Dithyrea californica</i> Harvey                                                 | Brassicaceae  | Not sequenced                          | AF137592      | NA                                           |              |
| <i>Draba corrugata</i> S. Wats. var. <i>corrugata</i>                              | Brassicaceae  | AY253247                               | AY254543      | Rancho Santa Ana Bot. Garden at Claremont    | 19377 (1996) |
| <i>Draba rigida</i> Willd.                                                         | Brassicaceae  | Not sequenced                          | AF401116      | NA                                           |              |
| <i>Eruca sativa</i> Mill.                                                          | Brassicaceae  | AY253240/ AY277688, AY277687, AY277692 | AY254536      | Botanical Interests Inc. *                   |              |
| <i>Erysimum capitatum</i> (Douglas ex. Hook.) E. L. Greene                         | Brassicaceae  | AY253248                               | AY254534      | Rancho Santa Ana Botanical Garden, Claremont | 18205 (1993) |
| <i>Guillenia flavescens</i> (Hook.) E. Greene                                      | Brassicaceae  | AY253260/ AY277689, AY277693, AY277694 | AY254527      | Rancho Santa Ana Botanical Garden, Claremont | 19164 (1996) |
| <i>Halimolobos jaegeri</i> (Munz) Rollins                                          | Brassicaceae  | Not sequenced                          | AF055201      | NA                                           |              |
| <i>Isatis indigotica</i> Fort.                                                     | Brassicaceae  | Not sequenced                          | AF384105      | NA                                           |              |
| <i>Lepidium africanum</i> (Burm. f.) DC.                                           | Brassicaceae  | AY253238                               | AY254529      | John Bowman, UC Davis                        |              |
| <i>Lepidium campestre</i> (L.) R. Br.                                              | Brassicaceae  | Not sequenced                          | AF055197      | NA                                           |              |
| <i>Lepidium flexicaule</i> Kirk                                                    | Brassicaceae  | Not sequenced                          | AF100685      | NA                                           |              |
| <i>Lepidium phlebopetalum</i> (F. Muell.) F. Muell.                                | Brassicaceae  | AY253239/ AY277686                     | AY254528      | John Bowman, UC Davis                        |              |
| <i>Lobularia maritima</i> (L.) Desv.                                               | Brassicaceae  | AY253242                               | AY254530      | Botanical Interests Inc.*                    |              |
| <i>Lycopersicon esculentum</i> L. cv. Microtom                                     | Solanaceae    | AY254705 ( <i>TAG1</i> )               | NA            | Juan Carbonell, Valencia, Spain              |              |
| <i>Lyrocarpa coulteri</i> Hook. & Harvey                                           | Brassicaceae  | Not sequenced                          | AF137591      | NA                                           |              |
| <i>Nasturtium officinale</i> R. Br.                                                | Brassicaceae  | AY253250                               | AY254531      | Botanical Interests Inc.*                    |              |
| <i>Oryza sativa</i> L. cv. <i>japonica</i>                                         | Poaceae       | AP003105 ( <i>OsMADS3</i> )            | N/A           |                                              |              |
| <i>Physaria acutifolia</i> Rydb.                                                   | Brassicaceae  | Not sequenced                          | AF137582      | NA                                           |              |
| <i>Petunia x hybrida</i>                                                           | Solanaceae    | AB076051 ( <i>PMADS3</i> )             | NA            | NA                                           |              |
| <i>Picea abies</i>                                                                 | Pinaceae      | X79280 ( <i>DAL2</i> )                 | NA            | NA                                           |              |
| <i>Picea mariana</i>                                                               | Pinaceae      | U69482 ( <i>SAG1a</i> )                | NA            | NA                                           |              |
| <i>Populus balsamifera</i> L. subsp. <i>trichocarpa</i> (Torr. & A. Gray) Brayshaw | Salicaceae    | AF052570 ( <i>PTAG1</i> )              | NA            | NA                                           |              |
| <i>Populus balsamifera</i> L. subsp. <i>trichocarpa</i> (Torr. & A. Gray) Brayshaw | Salicaceae    | AF052571 ( <i>PTAG2</i> )              | NA            | NA                                           |              |
| <i>Raphanus sativus</i> L. cv. Mei-Nong                                            | Brassicaceae  | Not sequenced                          | AF128105      | NA                                           |              |
| <i>Raphanus sativus</i> L. cv. Cherry Bell                                         | Brassicaceae  | AY253245                               | Not sequenced | Botanical Interests Inc.*                    |              |
| <i>Rorippa indica</i> (L.) Hiern                                                   | Brassicaceae  | Not sequenced                          | AF128108      | NA                                           |              |

|                                                                |              |                              |               |                                              |              |
|----------------------------------------------------------------|--------------|------------------------------|---------------|----------------------------------------------|--------------|
| <i>Sinapis alba</i> L.                                         | Brassicaceae | Not sequenced                | AF128106      | NA                                           |              |
| <i>Smelowskia calycina</i> (Stephne) C. A. Meyer               | Brassicaceae | Not sequenced                | AF137581      | NA                                           |              |
| <i>Streptanthus glandulosus</i> subsp. <i>pulchellus</i> Hook. | Brassicaceae | Not sequenced                | AF346652      | NA                                           |              |
| <i>Streptanthus insignis</i> Jepson                            | Brassicaceae | AY253259                     | Not sequenced | Rancho Santa Ana Botanical Garden, Claremont | 18924 (1995) |
| <i>Thlaspi arvense</i> L.                                      | Brassicaceae | AY253254/ AY277690, AY277691 | AY254532      | Univ. Kiel Botanical Garden                  | 346          |
| <i>Thysanocarpus</i> sp. Hook                                  | Brassicaceae | AY253255                     | AY254542      | Rancho Santa Ana Botanical Garden, Claremont | 18923 (1995) |
| <i>Zea mays</i> L.                                             | Poaceae      | X81199 ( <i>ZMM1</i> )       | NA            | NA                                           |              |
| <i>Zea mays</i> L.                                             | Poaceae      | L18924 ( <i>ZAG1</i> )       | NA            | NA                                           |              |
| <i>Zea mays</i> L.                                             | Poaceae      | X81200 ( <i>ZMM2</i> )       | NA            | NA                                           |              |
| <i>Zea mays</i> L.                                             | Poaceae      | X80206 ( <i>ZAG2</i> )       | NA            | NA                                           |              |

\*Commercial source

NA = Not applicable

**Supplementary Table 2: Oligonucleotide primers**

|         |                                           |
|---------|-------------------------------------------|
| oMX1133 | ACGTTCCATACTTT <u>A</u> ATTATTTGGAATATA   |
| oMX1134 | TATATTCCAAATAAT <u>T</u> AAAGTATGGAACGT   |
| oKB1009 | GGGTAACGCCAGGGTTTTCCAGTCACG               |
| oN-167  | AGACTGAATGCCACAGGCCGTCGAG                 |
| oN-471  | CCGTAGGTGAACCTCGGAGGG                     |
| oN-472  | GGTGATCCCGCCTGACCTGG                      |
| oN-583  | TCCATCCT <u>A</u> AATTGTTGTTAATGTC        |
| oN-584  | GACATTAACAACAAT <u>T</u> IAGGATGGA        |
| oN-601  | GAACCGATGTTT <u>A</u> ATTTAAGGTTTCGTAT    |
| oN-602  | ATACGAAACCTTAAAAT <u>T</u> AAACATCGGTTC   |
| oN-654  | GTAATATGAACAT <u>T</u> TGTATTGACCAAATGAG  |
| oN-655  | CTCATTGGTCAATAC <u>A</u> AAATGTTTCATATTAC |
| oN-1854 | GCAAGATTAGGTTTTTGTGTCTG                   |
| oRH1028 | ATTCCTCTCCCTTGAGGAAATCTG                  |
| oRH1029 | ACTAACTGGAGAGCGGTTTGGTC                   |
| oRH1034 | GTTCTTTGTGATGCTGAAGTCGCAC                 |
| oRH1035 | TATCCGATATTGCTTTCTTGTACCTC                |
| oRH1038 | GCTCTCATTGTCTTCTCCAGCCGTGGC               |
| oRH1039 | GCTATCAGAACAAGCCTTCTTGTACCTC              |
| oRH1040 | TTGCTTTGGTTGTCTTCTCAAACAGAGG              |
| oRH1041 | ATCTGAGCATGCTTTCTTGTACCTCTCG              |
| oRH1044 | TGCTGAAGTTGCTCTCATTGTCTTCTCC              |
| oRH1045 | AGTTCAGTGACAGAGCTAGTAGCTGAGC              |
| oRH1046 | TGAATTGTCTGTGCTCTGTGATGCTGAGG             |
| oRH1047 | GCCTCGGATACTGAACCAAGTGGTTGAGG             |
| oRH1050 | CAAGAAAGCTTACGAACTCTCTGTTCTTTG            |
| oRH1051 | TTAATTTCTGCCACGGATCCGGTGTTAG              |
| oRH1056 | AGGTTGCTCTTATCGTCTTCTC                    |
| oRH1057 | GCCTTTTTGTACCTCGAAATCG                    |
| oRH1058 | CTTAAGAAAGCTTATGAACTCTCTGTCC              |
| oRH1059 | TGAAACGGTCATGGCGGTGGAGGGATCCG             |
| oRH1082 | CCTAGACATGTTTCAGATGTCACTCTAATTTTGC        |
| oRH1083 | GCAAAATTAGAGTGACATCTGAACATGTCTAGG         |
| oRH1084 | CCTTAAATTTATCGAGCTAGCTGCCAACTGCCATGC      |
| oRH1085 | GCATGGCAGTTGGCAGCTAGCTCGATAAATTTAAGG      |
| oRH1095 | CAGAATTCTAGCTCGATAAATTTAAGGTTTC           |
| oRH1096 | CTGAATTCTCTGAACATGTCTAGGGTTTCAG           |

**Conserved sequence motifs in Brassicaceae AG Introns**

Yellow/purple shades -- conserved known or putative binding sites

Green shades -- polymorphic sites in relation to *A. thaliana*

**CCAATCA boxes**

|                    |                                                                   |
|--------------------|-------------------------------------------------------------------|
| L. africanum       | GACCAATCATGTCACTCTAATTTTGCCAGCATGGC-AGT-TGCAGCCAATCA--CTAG        |
| Lobularia          | AACCAATCATATCACTCTAATTTTGCCAGCTTGGT-AGC-TGTAGCCAATCA--CTAG        |
| Coronopus          | GACCAATCATGTCACTCTAATTTT-----TGGC-AGT-TACAGCCAATCA--CTAG          |
| B. oleracea        | GACCAATCATGTCACTC-AATTCCGCCAGCATGAA-AGT-TGTAGCCAATCA--CCAG        |
| Draba              | ---AA-CATGT---T-----T-----TGCAGCCAATCA--GTAG                      |
| Barbarea           | GACCAATCA-ATCACTCAAATTTTGCCAGCATGGC-AGT-TGCAGCCAATCA--CTAG        |
| Eruca              | -ACCAATCATGTCACTCTAATCTGGCCAGC-TGGC-AGT-TACAGCCAATCA--CTAG        |
| Raphanus           | GACCAATCATGTCACTCTAATTTTCGCCAGCATGGA-AGT-TGTAACCAATCA--CTAG       |
| Alyssum            | AACCAATCATGTCACTCTAATTTTGCCAGCTTGGC-AGC-TGTAGCCAATCA--GTAG        |
| Thlaspi            | GACCAATCATGTCACTCTAATTTTGCCAGCATGGC-AGT-TGCAGCCAATCA--CTAG        |
| Berberoa           | GACCAATCATGT-----TGCCAACTTGGCAGTT-TACAGCCAATCAGGTTAG              |
| C. rubella         | GACCAATCATGTCACTCTAATTTTGCCAGCGTGGCCAGT-TGCAGCCAATCA--GTAG        |
| L. phlebopetalum   | GACCAATCATGTCACTCTAATACTGCCAGCATGGC-TGC-TGCAACCAATCC--CTAG        |
| Diplotaxis         | GACCAATCATGTCACTCTAATTTTGCCAGCATGGC-AGT-TGCAGCCAATCA--CTAG        |
| Erysimum           | GACCAATCATGTCACTCTAATTTTGCCAGCATGGC-AGT-TGCAGCCAATCA--CTAG        |
| Camelina           | GACCAATCATGTCACTCTAATTTTGCCAGAACGGCCAGTTTGCAGCCAATCA--CTAG        |
| Thysanocarpus      | GACCAATCATGTCACTCTAATTTTGCCAGCATGGC-AGT-TGTAGCCAATCA--CTAG        |
| Cakile             | GACCAATCATGTCACTCTAATTTTGCCAGCATGGC-AGT-TGTAGCCAATCA--CTAG        |
| Guillenia          | GACCAATCATGTCACTCTAATTTTGCCAGCATGGC-AGT-TGCAGCCAATCA--CTAG        |
| C. bursa-pastoris  | GACCAATCATGTCACTCTAATTTTGCCAGCGTGGCCAGT-TGCAGCCAATCA--GTAG        |
| A. arenosa         | GACCAATCATGTCACTCTAATTTTGCCAGCATGGC-AGT-TGCAGCCAATCA--CCAG        |
| <b>A. thaliana</b> | <b>GACCAATCATGTCACTCTAATTTTGCCAGCATGGC-AGTTGGCAGCCAATCA--CTAG</b> |
| A. pumila          | GACCAATCATGTCACTCTAATTTTGCCAGCATGGC-AGT-TGCAGCCAATCA--CCAG        |
| A. gunnisoniana    | GACCAATCATGTCACTCTAATTTTGCAAGCATGGC-AGT-TGGAGCCAATCA--CTAG        |
| Nasturtium         | GACCAATCA-ATCAGTTAATTTTGCCAGCATGGC-AGT-CGCAGCCAATCA--CTAG         |
| A. lyrata          | GACCAATCATGTCACTCTAATTTTGCCAGCATGGC-AGT-TGCAGCCAATCA--CCAG        |
| Conringia          | GACCAATCATGTCACTCTAATTTTGCCAGCATGGC-AGT-TGCAGCCAATCA--CTAG        |
| Cheiranthus        | GACCAATCATGTCACTCTAATTTTGCCAGCATGGC-AGT-TACAACCAATCA--CTAG        |
| Streptanthus       | GACCAATCATGTCACTCTAATTTTGCCAGCATGGC-AGT-TGCAGCCAATCA--CTAG        |

**aAGAAT box**

L. africanum TTGTAAGATTTGTG--GTCTTTGTTACAGAATCTTTGAGAACGTCATC-ACACAGATATT  
 Lobularia CTGTAAGATTTGTT--GTCTTTGTTACAGAATCTTTGATCACGTCATC-ATACAGATATT  
 Coronopus TTGTAAGATTTGTT--GTCTTTGTTACAGAATCTTTGTAACGTCATC-ACACAGATATT  
 B. oleracea CTGTAAGATTTGTT--GTCTTTGTTACAGAATCTTTGATCACGTCATC-ACTCAGATATC  
 Draba TTTTAAGATTA-----AAAAT-----AATCAAACCTC  
 Barbarea CTTTAAGATTTGTT--GTCTTTGTTACAGAATCTTTGATCACGTCATC-ACACAGATATT  
 Eruca CTGTAAGATTTGTT--GTCTTTGTTACAGAATCTTTGATCACGTCATC-ACACGGATATT  
 Raphanus TTGTAAGATTTGTT--GTCTTTGTTATAGAATCTTTGATCACGTCATC-ACACAGATATT  
 Alyssum CTGTAAGATTTGTT--GTCTTTGTTACAGAATCTTTGATCACGTCATC-ATACAGATATT  
 Thlaspi CTGTAAGATTTGTT--GTCTTTGTTAAAGAATCTTTGATCACGTCATC-ACACAGATATT  
 Berteroa CTATAAGATTTGTT--GTCTTTGTTATAGAATCTTTGATAACGTCATC-ACACAGATATT  
 C. rubella ATGTAAGATTTAATTTGTCTTTGTTAAAGAATCTTTATCACGTCATC-ACTCAGATATT  
 L. phlebotetalum CTGTAAGATTTGTT--GTCTTTGTTAAAGAATCTTTGATCACGTCATC-ACTCAGATATT  
 Diplotaxis CTGTAAGATTTGTT--GTCTTTGTTACAGAATCTTTGATCACGTCATC-ACACAGATATT  
 Erysimum CTGTAAGATTTGTT--GTCTTTGTTACAGAATCTTTGATCACGTCATC-ACACAGATATT  
 Camelina ATGTAAGATTTGTT--GTCTTTGTTACAGAATCTTTGATCACGTCATC-ACTCAGATATT  
 Thysanocarpus CTGTAAGATTTGTT--GTCTTTGTTAGAGAATCTTTATCACGTCATC-ACACGGATATC  
 Cakile CTGTAAGATTTGTT--GTCTTTGTTACAGAATCTTTGATCACGTCACC-ACACAGATATT  
 Guillenia CTGTAAGATATGTT--GTCTGTGTTACAGAATCTTTGATCACGTCATC-ACACGGATATT  
 C. bursa-pastoris ATGTAAGATTTGTT--GTCTTTGTTAAAGAATCTTTATCACGTCATC-ACTCAGATATT  
 A. arenosa CTGTAAGATTTGTT--GTCTTTGTTAAAGAATCTTTGATCACGTCATCCACTCAGATATT  
**A. thaliana** **CTGTAAGATTTGTT--GTCTTTGTTAAAGAATCTTTGATCACGTCATC-ACTCAGATATT**  
 A. pumila CTGTAAGATTTGTT--GTCTTTGTTAAAGAATCTTTGATCACGTCATC-ACTCAGATATT  
 A. gunnisoniana CTGTAAGATTTGTT--GTCTTTGTTACAGAATCTTTGATCACGTCATC-ACTCAGATATT  
 Nasturtium TCTTTAGATTTGTT--GTCTTTGTTACAGAATCTTTGATCACGTCATC-ACACAGATATT  
 A. lyrata CTGTAAGATTTGCT--GTCTTTGTTAAAGAATCTTTGATCACGTCATC-ACTCAGATATT  
 Conringia CTGTAAGATTTGTT--GTCTTTGTTACAGAATCTTTGATCACGTCATC-ACACTGATATT  
 Cheiranthus CTGTAAGATTTGTT--GTCTTTGTTATAGAATCTTTGATCACGTCATC-ACACAGATATT  
 Streptanthus CTGTAAGATATGTT--GT-TTTGTTACAGAATCTTTGATAACGTCATC-ACATGAATATT



## LBS/WBS1

L. africanum ATCACTCCAATGGTTA  
 Lobularia ATTAGTC-ACTGGTTA  
 Coronopus ATCACTTCAATGGTTA  
 B. oleracea ATTAATCCGATGGTTA  
 Draba ATTAATCCAATGGTTA  
 Barbarea ATTAATCCAATGGTTA  
 Eruca ATTAATCTGATGGTTA  
 Raphanus ATTAATCCGATGGTTA  
 Alyssum ATTAGTC-ACTGGTTA  
 Thlaspi ATTAATCCAATGGTTA  
 Berteroa CTTAACCCAATGGTTA  
 C. rubella TCAAACCCAATGGTTA  
 L. phlebopetalum ATCACTCCAATGGTTA  
 Diplotaxis ATTAATCTGATGGTTA  
 Erysimum ATTAATCCAATGGTTA  
 Camelina TTAAATCCAATGGTTA  
 Thysanocarpus ATTAATCCGATGGTTA  
 Cakile ATTAATCCGATGGTTA  
 Guillenia ATTAATCCGATGGTTA  
 C. bursa-pastoris TTAAATCCAATGGTTA  
 A. arenosa ATTAATCCAATGGTTA  
**A. thaliana** **TTTAATCCAATGGTTA**  
 A. pumila ATTAATCCAATGGTTA  
 A. gunnisoniana ATTAATCTAATGGTTA  
 Nasturtium GTTAATCCAATGGTTA  
 A. lyrata ATTAATCCAATGGTTA  
 Conringia ATTAGTCCAATGGTTA  
 Cheiranthus ATTAATCCAATGGTTA  
 Streptanthus ATTAAACCGATGGTTT

## LBS/WBS2

CTGTTGGATTGA---ACAATGT--ATAATAG  
 CTGTTGGGTAA---CTATTGT--GTAATGA  
 CTGTTGGATTGA---ACAATGT--ATAATAG  
 CTACTGGATTGA---CCATGT--GCAATGG  
 CTGTTGGATTGA---CCAATGT--GTAATGG  
 CTGCTAGATTGA---CCAATGT--GTAACGA  
 CTACTGGATTGA---CCAATGT--GTAATGG  
 CTAGTGGATTGA---CCAATGT--GTAATGG  
 CTGTTGGGTAA---CTATTGT--GTAATGA  
 CTACTAGATTGA---CCAATGT--ATAAGGG  
 CTGTTGGGTGA---AGATTGTGTTTAATGG  
 ATATTGGATTGA---CCGATGTGTTTATTGG  
 CTGTTGGACTTA---TCAATGT--ATGATAG  
 CTACTGGATTGA---CCAATGT--GTAATGG  
 CTATTGGATTGA---CCAATGT--TTAATGT  
 ATGTTGGATTGA---CCAATGT--CTTAATGG  
 CTACTGGATTGA---CCAATGT--GTAATGG  
 CTACTGGATTGA---CCAATGT--GTAATGG  
 CTACTGGATTGA---CCAATGT--GTAATAG  
 ATATTGGATTGA---CCGATGTGTTTATTGG  
 CTATTGGATTGA---CCAATGTG--TTAATGG  
**CTATTGGATTGATACCCAATGTG--TTAATGG**  
 ATGTTGGATTGA---CCAATGTG--TTAACGG  
 ATGTTGGATTGA---CCAATGT--GTAATGG  
 CTGCTAGATTGA---TCAATGT--GTAACGG  
 CTATTGGATTGA---CCAATGTG--TTAATGG  
 CTGTTGGATTGA---CCAATGT--GTAATGG  
 CTATTGGATTGA---CCAATGT--TTAATGT  
 CTACTGGATTGA---CCAATGT--GTAATGG



**LBS/WBS3**

L. africanum CCATCCTCCATTGT-GTAATGTCTGT  
 Lobularia CCATCCTCCATTGTGTTAATGTCTGT  
 Coronopus CCATCCTCCATTGTGTTAAATTCTGT  
 B. oleracea CCATCCTCCATTGTGTTAATGTCTGT  
 Draba TCATCCTCCATTGTGTTAATTTCTGT  
 Barbarea CCATCCTCCATTGTGTTAATGTCTGT  
 Eruca CAATCCTCCATTGTGTTAATCTCTGT  
 Raphanus CCATCCTCCATTGTGTTAATGTCTGT  
 Alyssum CCATCCTCCATTGTGTTAATGTCTGT  
 Thlaspi CCATCCTCCATTGTGTTAATGTCTGT  
 Berteroa TCTTCTCCATTGTGTTAATGTCTGT  
 C. rubella CCATCCTCCATTGTGTTAATGTCTGT  
 L. phlebotetalum CCATCCTCCATTGTGTTAATGT-TAT  
 Diplotaxis CCATCCTCCATTGTGTTAATGTCTGT  
 Erysimum CCATCCTCCATTGTGTTAATGTCTGT  
 Camelina CCATCCTCCATTGTGTTAATGTCTGT  
 Thysanocarpus ACATCCTCCATTGTGTTAATGTCTG-  
 Cakile CCATCCTCCATTGTGTTAATTTCTGT  
 Guillenia CCATCCTCCATTGTGTTAATGTCTGT  
 C. bursa-pastoris CCATCCTCCATTGTGTTAATGTCTGT  
 A. arenosa -CATCCTCCATTGTGTTAATGTCTGT  
**A. thaliana** **CCATCCTCCATTGTGTTAATGTCTGT**  
 A. pumila ATCTCCTCCATTGTGTTAATGTCTGT  
 A. gunnisoniana CCATCCTCCATTGTGTTAATGTCTGT  
 Nasturtium CCATCCTCCATTGTGTTAATGTCTGT  
 A. lyrata CCATCCTCCATTGTGTTAATGTCTGT  
 Conringia CCATCCTCCATTGTGTTAATGTCTG-  
 Cheiranthus CCATCCTCCATTGTGTTAATGTCTGT  
 Streptanthus CCATCCTCCATTGTGTTAATGTCTGT

**LBS4**

TCACATTTGGT--CAATA--CCAC-AATGC  
 TTTTGTTCGT--AAATAG-AAGC-CACAA  
 TCACATTTGGT--CAATA--CCAC-AATAT  
 TCGCATATGGT--CAATAC-CTAA-TATAA  
 TCACATTTGGT--CAATAC-CCAA-TATGA  
 TCACATTTGGT--CAATAC-CCAA-TGAAT  
 TCACATTTGGT--CAATAC-CTAA-TATAA  
 TCACATTTGGT--CAATAC-CTTA-TATAA  
 TTTTGTACGT--AAATAG-AAGC-CACAA  
 TCACATTTGGT--CAATAC-CCAA-TATTA  
 TCACATTTGGT--CATTACC-CAA-ACATA  
 TCACATTTGGT--CAATAC-CCAATGTTC  
 TCACATTGTGTATCAATACC-CAA-TGTTT  
 TCACATTTGGT--CAATAC-CTTA-TATAA  
 TCACATTTGGC---AATAC-CAA-TGTTC  
 TCACATTTGGT--CAATAC-CAA-TGTTT  
 TTACATTTGGTG-AAATAC-CAA-TATAA  
 TCCCATTTGGT--CAATAC-CTAA-TATAA  
 TCAAATTTGGT--CAATAC-CAA-TATAA  
 TCACATTTGGT--CAATAC-CAA-TGTTT  
 TCTCACTGGC---AATAC-CAA-TGTTC  
**TCTCATTTGGT--CAATAC-CAA-TGTTT**  
 TCACATCTGGTC-AAATAC-CAA-TGTTC  
 TCACATTTGGT--CAATAC-CAA-TGTTC  
 TCACATTTGGT--CAATAC-CAA-TGTAA  
 TCTCACTGGT--CAATAC-CAA-TGTTC  
 TCACGTTTGGT--CAATAC-CAA-TATAT  
 TCACATTTGGT--CAATAC-CAA-TGTTC  
 TCACATTTGGT--TAATAC-CAA-TATAA
